# Supplementary material for: Safety of Innovative Nanotechnology Oral Formulations Loaded with Bioactive Menopause Molecules: Influence of Genotoxicity and Biochemical Parameters on a Menopausal Rat Model
Source: MDPI journal article supplement (doi:10.3390/nu15234951), 2023-11-29
Supplement: s1 [file s1]

**Table S1.** Biochemical parameters on blood samples in surgically induced menopausal model in female Wistar rats

Table no.1 Serum alkaline phosphatase (U./L) level in oophorectomized rat females in an experimental model of induced menopause

|                      | N | Mean    | Std. Dev. | Min   | Item 25 | Paragraph 75 | Max    |
|----------------------|---|---------|-----------|-------|---------|--------------|--------|
| Normal control       | 8 | 76.234  | 10.864    | 51.72 | 74.732  | 82.188       | 86.48  |
| Operated control     | 8 | 116.59  | 18.971    | 93.99 | 108.825 | 117.645      | 158.8  |
| Control EG/PG        | 8 | 85.188  | 20.354    | 64.07 | 77.552  | 85.285       | 132.32 |
| Control NN           | 8 | 120.628 | 43.87     | 72.83 | 92.073  | 131.27       | 212.42 |
| NLC Evæg 1           | 8 | 76.98   | 20.92     | 53.45 | 65.472  | 81.16        | 116.72 |
| NLC Evæg 2           | 8 | 108.269 | 28.187    | 76.45 | 90.602  | 116.79       | 156.19 |
| NLC Evæg 3           | 8 | 96.589  | 11.872    | 79.49 | 87.998  | 104.362      | 116.27 |
| NLC Evæg 4           | 8 | 106.539 | 39.131    | 69.92 | 88.068  | 105.872      | 198.19 |
| NLC Evæg 5           | 8 | 114.591 | 31.401    | 87.92 | 96.25   | 124.045      | 182.33 |
| NLC Evæg 6           | 8 | 137.601 | 34.633    | 76.19 | 125.805 | 153.485      | 181.73 |
| ANOVA P<0.000321 *** |   |         |           |       |         |              |        |

Table no.2 Level of calcium (mg/dL) in oophorectomised rat females in an experimental model of induced menopause

|                  | N | Mean   | Std. Dev. | Min   | Item 25 | Paragraph 75 | Max    |
|------------------|---|--------|-----------|-------|---------|--------------|--------|
| Normal control   | 8 | 9.605  | 0.585     | 8.656 | 9.316   | 9.874        | 10.619 |
| Operated control | 8 | 9.749  | 1.01      | 8.331 | 9.118   | 10.244       | 11.112 |
| Control EG/PG    | 8 | 10.157 | 0.901     | 8.567 | 9.812   | 10.671       | 11.409 |
| Control NN       | 8 | 9.915  | 1.633     | 8.093 | 8.543   | 11.414       | 11.927 |
| NLC Evæg 1       | 8 | 9.396  | 0.987     | 8.406 | 8.719   | 9.612        | 11.511 |
| NLC Evæg 2       | 8 | 9.689  | 0.71      | 9.024 | 9.339   | 9.804        | 11.246 |
| NLC Evæg 3       | 8 | 10.257 | 1.735     | 8.291 | 8.946   | 11.751       | 12.95  |
| NLC Evæg 4       | 8 | 9.961  | 1.294     | 8.106 | 9.523   | 10.247       | 12.225 |
| NLC Evæg 5       | 8 | 10.993 | 2.382     | 8.096 | 9.132   | 12.016       | 15.328 |
| NLC Evæg 6       | 8 | 10.493 | 1.549     | 8.496 | 9.777   | 11.12        | 13.199 |
| ANOVA P=0.502    |   |        |           |       |         |              |        |

Table no.3 Level of phosphatemia (mg/dL) in females of oophorectomised rats in experimental model of induced menopause

|                  | N | Mean  | Std. Dev. | Min  | Item 25 | Paragraph 75 | Max  |
|------------------|---|-------|-----------|------|---------|--------------|------|
| Normal control   | 8 | 6.381 | 0.862     | 5.27 | 5.808   | 6.935        | 7.64 |
| Operated control | 8 | 6.763 | 0.507     | 6.1  | 6.458   | 6.945        | 7.71 |
| Control EG/PG    | 8 | 6.776 | 0.48      | 6.26 | 6.36    | 7.075        | 7.64 |
| Control NN       | 8 | 6.424 | 1.046     | 4.48 | 5.8     | 7.41         | 7.44 |
| NLC Evæg 1       | 8 | 6.416 | 0.331     | 5.89 | 6.265   | 6.607        | 6.94 |

|               |   |       |       |      |       |       |       |
|---------------|---|-------|-------|------|-------|-------|-------|
| NLC Evveg 2   | 8 | 6.829 | 1.125 | 4.99 | 6.447 | 7.528 | 8.12  |
| NLC Evveg 3   | 8 | 7.046 | 1.255 | 5.1  | 6.193 | 8.183 | 8.7   |
| NLC Evveg 4   | 8 | 7.889 | 1.734 | 6.82 | 7.115 | 7.795 | 12.07 |
| NLC Evveg 5   | 8 | 6.924 | 0.594 | 5.84 | 6.773 | 7.275 | 7.63  |
| NLC Evveg 6   | 8 | 7.12  | 1.461 | 5.72 | 6.225 | 8.075 | 9.9   |
| ANOVA P=0.171 |   |       |       |      |       |       |       |

Table no. 4 Blood glucose level (mg/dL) in oophorectomized rats in experimental model of induced menopause

|                    | N | Mean<br>(mg/dL) | Std. Dev. | Min<br>(mg/dL) | Item 25 | Paragraph<br>75 | Max<br>(mg/dL) |
|--------------------|---|-----------------|-----------|----------------|---------|-----------------|----------------|
| Normal control     | 8 | 119.748         | 33.87     | 53.12          | 110.807 | 140.075         | 160.86         |
| Operated control   | 8 | 136.589         | 39.779    | 73.48          | 114.18  | 159.395         | 192.64         |
| Control EG/PG      | 8 | 158.333         | 38.256    | 103.87         | 139.765 | 180.642         | 226.95         |
| Control NN         | 8 | 145.801         | 27.662    | 109.4          | 131.812 | 154.46          | 196.69         |
| NLC Evveg 1        | 8 | 89.246          | 10.827    | 65.7           | 88.758  | 92.968          | 102.63         |
| NLC Evveg 2        | 8 | 121.721         | 29.689    | 85             | 100.865 | 137.402         | 172.58         |
| NLC Evveg 3        | 8 | 132.974         | 42.205    | 78.92          | 102.745 | 152.882         | 210.12         |
| NLC Evveg 4        | 8 | 155.572         | 28.294    | 111.72         | 140.715 | 173.7           | 190.45         |
| NLC Evveg 5        | 8 | 149.512         | 39.229    | 100.49         | 122.687 | 162.72          | 222.76         |
| NLC Evveg 6        | 8 | 154.637         | 37.729    | 74.34          | 146.588 | 174.372         | 195.24         |
| ANOVA P<0.00253 ** |   |                 |           |                |         |                 |                |

Table no. 5 Level of AST (U/L) activity in oophorectomized rat females in an experimental model of induced menopause

|                  | N | Mean    | Std. Dev. | Min    | Item 25 | Paragraph 75 | Max    |
|------------------|---|---------|-----------|--------|---------|--------------|--------|
| Normal control   | 8 | 141.974 | 50.564    | 94.75  | 103.498 | 164.132      | 243.19 |
| Operated control | 8 | 155.122 | 34.074    | 108.96 | 130.62  | 167.047      | 217.23 |
| Control EG/PG    | 8 | 143.345 | 18.514    | 118.49 | 136.237 | 149.468      | 170.66 |
| Control NN       | 8 | 193.171 | 106.884   | 102.99 | 133.04  | 204.19       | 432.06 |
| NLC Evveg 1      | 8 | 160.655 | 21.949    | 135.2  | 144.065 | 181.01       | 191.4  |
| NLC Evveg 2      | 8 | 151.166 | 45.898    | 107.96 | 125.43  | 160.64       | 224.22 |
| NLC Evveg 3      | 8 | 374.861 | 489.758   | 101.8  | 118.465 | 343.335      | 1558   |
| NLC Evveg 4      | 8 | 186.839 | 63.478    | 127.56 | 130.865 | 240.45       | 275.04 |
| NLC Evveg 5      | 8 | 215.806 | 155.063   | 135.75 | 149.353 | 177.815      | 596.36 |
| NLC Evveg 6      | 8 | 173.108 | 40.871    | 110.67 | 154.165 | 200.658      | 231.24 |
| ANOVA P=0.235    |   |         |           |        |         |              |        |

Table no. 6 ALT (U/L) activity level in oophorectomized rats in an experimental model of induced menopause

|  | N | Mean | Std. Dev. | Min | Item 25 | Paragraph 75 | Max |
|--|---|------|-----------|-----|---------|--------------|-----|
|--|---|------|-----------|-----|---------|--------------|-----|

|                  |   |        |        |       |        |        |       |
|------------------|---|--------|--------|-------|--------|--------|-------|
| Normal control   | 8 | 53.043 | 8.226  | 41.06 | 45.853 | 58.485 | 61.99 |
| Operated control | 8 | 52.53  | 12.607 | 30.67 | 45.803 | 62.51  | 68.38 |
| Control EG/PG    | 8 | 55.802 | 16.825 | 33.16 | 48.17  | 60.53  | 85.3  |
| Control NN       | 8 | 69.026 | 34.223 | 38    | 47.02  | 92.572 | 135.1 |
| NLC Evæg 1       | 8 | 44.17  | 11.304 | 22.11 | 41.272 | 51.66  | 59.16 |
| NLC Evæg 2       | 8 | 48.992 | 10.642 | 36.2  | 44.578 | 49.752 | 71.58 |
| NLC Evæg 3       | 8 | 58.906 | 9.334  | 48.13 | 50.75  | 64.532 | 74.06 |
| NLC Evæg 4       | 8 | 49.905 | 6.687  | 39.91 | 45.172 | 52.612 | 61.78 |
| NLC Evæg 5       | 8 | 55.811 | 13.711 | 43.9  | 45.575 | 56.682 | 86.72 |
| NLC Evæg 6       | 8 | 59.305 | 7.421  | 47.65 | 56.772 | 63.828 | 69.38 |
| ANOVA P=0.124    |   |        |        |       |        |        |       |

Table no. 7 BD level in oophorectomy rat females in an experimental model of induced menopause

|                  | N | Mean  | Std. Dev. | Min   | Item 25 | Paragraph 75 | Max   |
|------------------|---|-------|-----------|-------|---------|--------------|-------|
| Normal control   | 8 | 0.078 | 0.054     | 0.018 | 0.03    | 0.123        | 0.154 |
| Operated control | 8 | 0.046 | 0.023     | 0.012 | 0.027   | 0.061        | 0.07  |
| Control EG/PG    | 8 | 0.044 | 0.021     | 0.02  | 0.029   | 0.062        | 0.078 |
| Control NN       | 8 | 0.101 | 0.164     | 0.007 | 0.013   | 0.082        | 0.491 |
| NLC Evæg 1       | 8 | 0.055 | 0.032     | 0.019 | 0.028   | 0.073        | 0.111 |
| NLC Evæg 2       | 8 | 0.05  | 0.026     | 0.016 | 0.032   | 0.06         | 0.098 |
| NLC Evæg 3       | 8 | 0.036 | 0.022     | 0.007 | 0.024   | 0.044        | 0.077 |
| NLC Evæg 4       | 8 | 0.04  | 0.025     | 0.013 | 0.022   | 0.051        | 0.087 |
| NLC Evæg 5       | 8 | 0.035 | 0.019     | 0.012 | 0.023   | 0.044        | 0.064 |
| NLC Evæg 6       | 8 | 0.049 | 0.026     | 0.027 | 0.034   | 0.053        | 0.107 |
| ANOVA P= 0.469   |   |       |           |       |         |              |       |

Table no. 8 BT level in oophorectomy rat females in experimental model of induced menopause

|                  | N | Mean  | Std. Dev. | Min   | Item 25 | Paragraph 75 | Max   |
|------------------|---|-------|-----------|-------|---------|--------------|-------|
| Normal control   | 8 | 0.311 | 0.154     | 0.103 | 0.216   | 0.456        | 0.514 |
| Operated control | 8 | 0.243 | 0.101     | 0.12  | 0.175   | 0.292        | 0.403 |
| Control EG/PG    | 8 | 0.231 | 0.111     | 0.103 | 0.169   | 0.267        | 0.44  |
| Control NN       | 8 | 0.161 | 0.09      | 0.029 | 0.118   | 0.188        | 0.334 |
| NLC Evæg 1       | 8 | 0.268 | 0.15      | 0.006 | 0.189   | 0.371        | 0.488 |
| NLC Evæg 2       | 8 | 0.245 | 0.172     | 0.129 | 0.139   | 0.255        | 0.6   |
| NLC Evæg 3       | 8 | 0.172 | 0.13      | 0.032 | 0.117   | 0.186        | 0.445 |
| NLC Evæg 4       | 8 | 0.178 | 0.084     | 0.084 | 0.094   | 0.24         | 0.286 |
| NLC Evæg 5       | 8 | 0.196 | 0.127     | 0.053 | 0.085   | 0.261        | 0.421 |
| NLC Evæg 6       | 8 | 0.155 | 0.082     | 0.045 | 0.108   | 0.194        | 0.281 |

ANOVA P= 0.21

Table no. 9 Total cholesterolemia level (mg/dL) in oophorectomized rats in an experimental model of induced menopause

|                         | N | Mean   | Std. Dev. | Min | Item 25 | Paragraph 75 | Max |
|-------------------------|---|--------|-----------|-----|---------|--------------|-----|
| <b>Normal control</b>   | 8 | 66.5   | 14.233    | 41  | 62.5    | 75.25        | 83  |
| <b>Operated control</b> | 8 | 63     | 18.959    | 40  | 48.75   | 82           | 88  |
| <b>Control EG/PG</b>    | 8 | 81.125 | 13.517    | 65  | 68      | 89           | 100 |
| <b>Control NN</b>       | 8 | 72.125 | 16.444    | 43  | 60.5    | 82.75        | 93  |
| <b>NLC Evveg 1</b>      | 8 | 61.375 | 10.419    | 51  | 55.75   | 63           | 84  |
| <b>NLC Evveg 2</b>      | 8 | 66.775 | 12.163    | 49  | 62.15   | 69           | 92  |
| <b>NLC Evveg 3</b>      | 8 | 69.375 | 17.345    | 40  | 62      | 82.25        | 90  |
| <b>NLC Evveg 4</b>      | 8 | 75.625 | 16.248    | 54  | 68      | 79           | 103 |
| <b>NLC Evveg 5</b>      | 8 | 79.5   | 15.203    | 57  | 73.25   | 84.5         | 109 |
| <b>NLC Evveg 6</b>      | 8 | 68.5   | 14.081    | 45  | 59.25   | 75.25        | 91  |
| ANOVA P= 0.145          |   |        |           |     |         |              |     |

Table no. 10 Level of HDL-cholesterolemia (mg/dL) in females of oophorectomized rats in the experimental model of induced menopause

|                         | N | Mean   | Std. Dev. | Min   | Item 25 | Paragraph 75 | Max   |
|-------------------------|---|--------|-----------|-------|---------|--------------|-------|
| <b>Normal control</b>   | 8 | 29.644 | 9.99      | 18.27 | 19.6    | 38.35        | 41.34 |
| <b>Operated control</b> | 8 | 17.747 | 9.159     | 7.67  | 10.587  | 21.18        | 31.9  |
| <b>Control EG/PG</b>    | 8 | 24.005 | 11.044    | 5.5   | 17.765  | 33.608       | 37.76 |
| <b>Control NN</b>       | 8 | 23.972 | 15.665    | 7.28  | 11.478  | 28.625       | 49.74 |
| <b>NLC Evveg 1</b>      | 8 | 21.364 | 7.083     | 13.72 | 17.598  | 22.6         | 36.84 |
| <b>NLC Evveg 2</b>      | 8 | 22.69  | 6.922     | 11.29 | 19.2    | 25.988       | 32.28 |
| <b>NLC Evveg 3</b>      | 8 | 17.869 | 8.574     | 9.16  | 12.758  | 19.535       | 36.15 |
| <b>NLC Evveg 4</b>      | 8 | 23.852 | 9.435     | 16.04 | 16.843  | 29.07        | 39.74 |
| <b>NLC Evveg 5</b>      | 8 | 26.62  | 13.914    | 14.5  | 16.753  | 32.3         | 54.93 |
| <b>NLC Evveg 6</b>      | 8 | 18.98  | 8.465     | 2.92  | 16.858  | 24.218       | 29.56 |
| ANOVA P= 0.383          |   |        |           |       |         |              |       |

Table no. 11 Triglyceremia level (mg/dL) in females of oophorectomized rats in an experimental model of induced menopause

|                         | N | Mean    | Std. Dev. | Min   | Item 25 | Paragraph 75 | Max    |
|-------------------------|---|---------|-----------|-------|---------|--------------|--------|
| <b>Normal control</b>   | 8 | 96.028  | 53.029    | 52.8  | 59.025  | 97.005       | 214.75 |
| <b>Operated control</b> | 8 | 160.496 | 72.602    | 45.1  | 121.202 | 212.61       | 269.92 |
| <b>Control EG/PG</b>    | 8 | 116.42  | 64.793    | 54.49 | 76.698  | 141.228      | 246.95 |

|                        |   |         |        |       |        |         |        |
|------------------------|---|---------|--------|-------|--------|---------|--------|
| <b>Control NN</b>      | 8 | 128.622 | 81.681 | 64.6  | 93.935 | 128.93  | 321.51 |
| <b>NLC Evæg 1</b>      | 8 | 58.803  | 20.093 | 39.4  | 47.557 | 63.882  | 97.76  |
| <b>NLC Evæg 2</b>      | 8 | 86.464  | 45.476 | 38.07 | 49.558 | 110.798 | 156.4  |
| <b>NLC Evæg 3</b>      | 8 | 93.028  | 35.904 | 61.21 | 71.688 | 104.24  | 153.1  |
| <b>NLC Evæg 4</b>      | 8 | 103.18  | 52.479 | 41.65 | 61.888 | 139.515 | 184.54 |
| <b>NLC Evæg 5</b>      | 8 | 90.629  | 58.283 | 45.95 | 57.025 | 92.538  | 227.86 |
| <b>NLC Evæg 6</b>      | 8 | 102.884 | 27.784 | 61.75 | 87.447 | 118.285 | 148.69 |
| <b>ANOVA P= 0.0521</b> |   |         |        |       |        |         |        |

Table no.12 Serum creatinine level in oophorectomized rat females in an experimental model of induced menopause

|                       | <b>N</b> | <b>Mean</b> | <b>Std. Dev.</b> | <b>Min</b> | <b>Item 25</b> | <b>Paragraph 75</b> | <b>Max</b> |
|-----------------------|----------|-------------|------------------|------------|----------------|---------------------|------------|
| Normal control        | 8        | 0.356       | 0.044            | 0.295      | 0.343          | 0.361               | 0.446      |
| Operated control      | 8        | 0.31        | 0.078            | 0.164      | 0.282          | 0.34                | 0.427      |
| Control EG/PG         | 8        | 0.348       | 0.074            | 0.252      | 0.28           | 0.389               | 0.453      |
| Control NN            | 8        | 0.406       | 0.154            | 0.2        | 0.357          | 0.442               | 0.695      |
| NLC Evæg 1            | 8        | 0.355       | 0.062            | 0.248      | 0.344          | 0.387               | 0.425      |
| NLC Evæg 2            | 8        | 0.329       | 0.105            | 0.1 79     | 0.233          | 0.414               | 0.454      |
| NLC Evæg 3            | 8        | 0.397       | 0.074            | 0.282      | 0.367          | 0.409               | 0.545      |
| NLC Evæg 4            | 8        | 0.39        | 0.069            | 0.317      | 0.347          | 0.431               | 0.517      |
| NLC Evæg 5            | 8        | 0.416       | 0.042            | 0.351      | 0.388          | 0.44                | 0.479      |
| NLC Evæg 6            | 8        | 0.341       | 0.054            | 0.268      | 0.291          | 0.377               | 0.417      |
| <b>ANOVA P= 0.165</b> |          |             |                  |            |                |                     |            |

Table no.13 Serum urea level (mg/dL) in oophorectomised rat females in an experimental model of induced menopause

|                         | <b>N</b> | <b>Mean</b> | <b>Std. Dev.</b> | <b>Min</b> | <b>Item 25</b> | <b>Paragraph 75</b> | <b>Max</b> |
|-------------------------|----------|-------------|------------------|------------|----------------|---------------------|------------|
| <b>Normal control</b>   | 8        | 40.201      | 10.457           | 25.43      | 31.208         | 46.028              | 56.53      |
| <b>Operated control</b> | 8        | 36.892      | 14.6             | 18.21      | 27.135         | 44.365              | 63.63      |
| <b>Control EG/PG</b>    | 8        | 37.575      | 6.115            | 29.03      | 34.208         | 41.818              | 46.96      |
| <b>Control NN</b>       | 8        | 39.842      | 11.996           | 22.5       | 29.96          | 47.87               | 53.38      |
| <b>NLC Evæg 1</b>       | 8        | 39.165      | 6.562            | 28.52      | 36.635         | 41.445              | 48.7       |
| <b>NLC Evæg 2</b>       | 8        | 38.054      | 5.342            | 29.6       | 35.847         | 39.158              | 48.07      |
| <b>NLC Evæg 3</b>       | 8        | 40.664      | 10.943           | 23.03      | 34.845         | 47.41               | 57         |
| <b>NLC Evæg 4</b>       | 8        | 40.325      | 10.584           | 18.99      | 38.017         | 48.04               | 51.11      |
| <b>NLC Evæg 5</b>       | 8        | 31.119      | 8.017            | 16.7       | 27.798         | 35.048              | 41.35      |
| <b>NLC Evæg 6</b>       | 8        | 41.77       | 6.434            | 34.54      | 37.818         | 42.91               | 54.91      |
| <b>ANOVA P= 0.619</b>   |          |             |                  |            |                |                     |            |

Table no. 14 The level of uricemia in females of the oophorotomized rat in the experimental model of induced menopause

|                         | N | Mean  | Std. Dev. | Min   | Item 25 | Paragraph 75 | Max   |
|-------------------------|---|-------|-----------|-------|---------|--------------|-------|
| <b>Normal control</b>   | 8 | 1.321 | 0.436     | 0.589 | 0.99    | 1.58         | 1.912 |
| <b>Operated control</b> | 8 | 1.528 | 0.931     | 0.357 | 0.868   | 1.834        | 3.199 |
| <b>Control EG/PG</b>    | 8 | 1.557 | 0.364     | 0.966 | 1.28    | 1.759        | 2.065 |
| <b>Control NN</b>       | 8 | 1.544 | 0.774     | 0.816 | 1.114   | 1.669        | 3.149 |
| <b>NLC Eveg 1</b>       | 8 | 0.78  | 0.153     | 0.595 | 0.621   | 0.885        | 0.984 |
| <b>NLC Eveg 2</b>       | 8 | 1.526 | 0.539     | 0.766 | 1.233   | 1.797        | 2.327 |
| <b>NLC Eveg 3</b>       | 8 | 1.464 | 0.56      | 0.839 | 0.969   | 1.749        | 2.308 |
| <b>NLC Eveg 4</b>       | 8 | 1.45  | 0.511     | 0.721 | 1.105   | 1.804        | 2.213 |
| <b>NLC Eveg 5</b>       | 8 | 1.247 | 0.964     | 0.407 | 0.713   | 1.246        | 3.429 |
| <b>NLC Eveg 6</b>       | 8 | 1.247 | 0.513     | 0.417 | 0.87    | 1.621        | 1.879 |
| <b>ANOVA P= 0.326</b>   |   |       |           |       |         |              |       |

Table no.15 Level of serum acid phosphatase activity (U/L) in females of oophorectomized rats in an experimental model of induced menopause

|                         | N | Mean   | Std. Dev. | Min   | Item 25 | Paragraph 75 | Max   |
|-------------------------|---|--------|-----------|-------|---------|--------------|-------|
| <b>Normal control</b>   | 8 | 13.781 | 5.269     | 7.64  | 9.695   | 17.782       | 21.91 |
| <b>Operated control</b> | 8 | 15.39  | 5.71      | 7.77  | 12.703  | 17.683       | 27.07 |
| <b>Control EG/PG</b>    | 8 | 12.601 | 4.079     | 4.82  | 10.838  | 15.147       | 17.31 |
| <b>Control NN</b>       | 8 | 16.852 | 5.951     | 8.6   | 12.725  | 21.362       | 25.61 |
| <b>NLC Eveg 1</b>       | 8 | 14.057 | 4.222     | 8.25  | 12.682  | 14.348       | 23.2  |
| <b>NLC Eveg 2</b>       | 8 | 16.204 | 3.787     | 12.82 | 14.395  | 16.372       | 24.99 |
| <b>NLC Eveg 3</b>       | 8 | 17.495 | 4.772     | 11.69 | 13.642  | 22.515       | 23.3  |
| <b>NLC Eveg 4</b>       | 8 | 18.701 | 4.476     | 14.52 | 16.14   | 19.625       | 28.56 |
| <b>NLC Eveg 5</b>       | 8 | 15.939 | 1.603     | 12.96 | 15.435  | 16.773       | 18.18 |
| <b>NLC Eveg 6</b>       | 8 | 20.918 | 5.097     | 15.62 | 17.735  | 22.587       | 31.25 |
| <b>ANOVA P = 0.0282</b> |   |        |           |       |         |              |       |

Table no.16 Total serum protein level (g/L) in oophorectomised rat females in an experimental model of induced menopause

|                         | N | Mean   | Std. Dev. | Min   | Item 25 | Paragraph 75 | Max   |
|-------------------------|---|--------|-----------|-------|---------|--------------|-------|
| <b>Normal control</b>   | 8 | 60.354 | 8.572     | 47.69 | 55.812  | 65.438       | 73.69 |
| <b>Operated control</b> | 8 | 48.015 | 3.51      | 43.74 | 46.11   | 49.472       | 54.57 |
| <b>Control EG/PG</b>    | 8 | 60.136 | 12.931    | 43.64 | 49.603  | 69.878       | 79.07 |
| <b>Control NN</b>       | 8 | 57.669 | 8.48      | 48.22 | 51.335  | 60.76        | 74.4  |
| <b>NLC Eveg 1</b>       | 8 | 47.021 | 3.936     | 40.38 | 45.46   | 48.062       | 54.36 |
| <b>NLC Eveg 2</b>       | 8 | 50.189 | 6.086     | 37.85 | 48.938  | 52.77        | 58.85 |
| <b>NLC Eveg 3</b>       | 8 | 56.656 | 5.452     | 46.83 | 54.467  | 60.172       | 64.99 |

|                       |   |        |       |       |        |        |       |
|-----------------------|---|--------|-------|-------|--------|--------|-------|
| NLC Evæg 4            | 8 | 57.074 | 5.644 | 49.04 | 52.135 | 62.075 | 63.71 |
| NLC Evæg 5            | 8 | 58.261 | 5.535 | 52.3  | 53.822 | 60.883 | 68.57 |
| NLC Evæg 6            | 8 | 57.781 | 5.781 | 49.54 | 54.44  | 59.425 | 67.75 |
| ANOVA P= 0.000444 *** |   |        |       |       |        |        |       |

[illegible][illegible]
